# Supplementary material
Source: Copernicus journal article supplement (doi:10.5194/egusphere-2026-2149)
Supplement: Supplementary file 1 [file egusphere-2026-2149-supplement.pdf]

## Supplementary Bed Material Comparisons

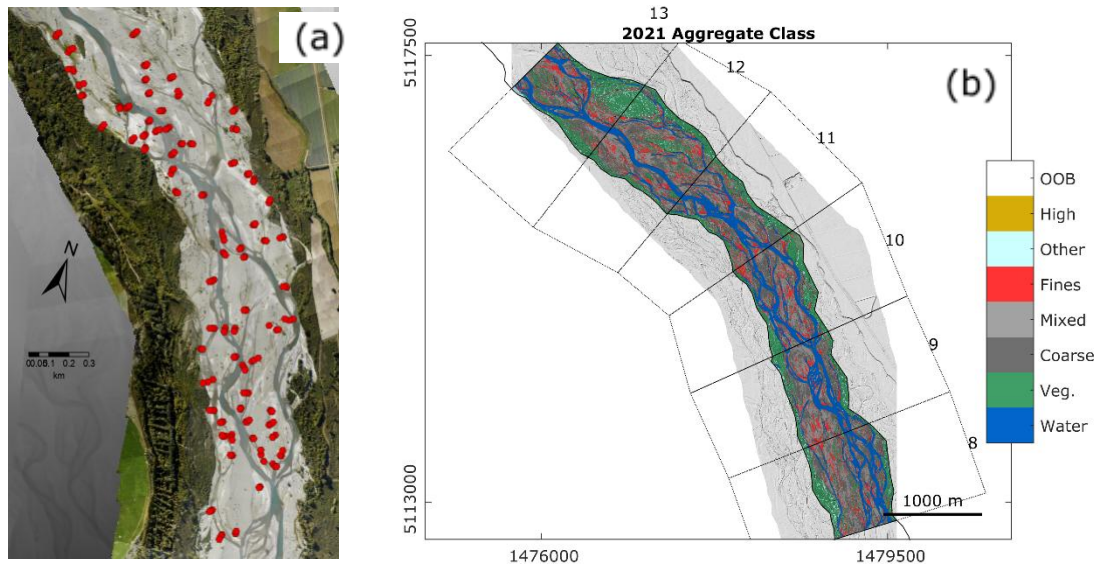

**Figure S1** – (a) Map of NIWA (now ESNZ) pebble count data  $N > 200$  pebble counts in riffle/run/pool channel types and bed, bank and bar top geomorphic units between river kms 9-12 (imagery: this study). (b) Aggregate class map from this study

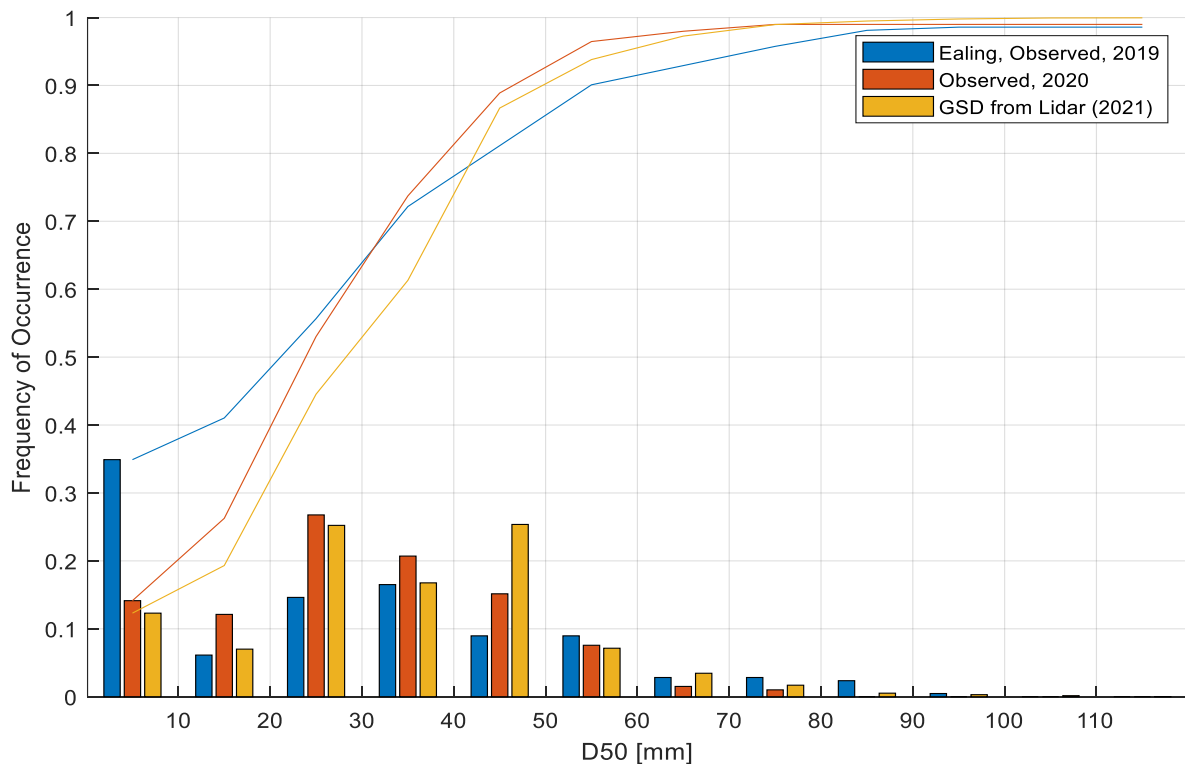

**Figure S2** – Histogram and cumulative frequency of median grain size (D50) from observed pebble counts in 2019 and 2020, and D50 on exposed (non-vegetated) braidplain estimated from the class-based GSD aggregation (Section 3.1).

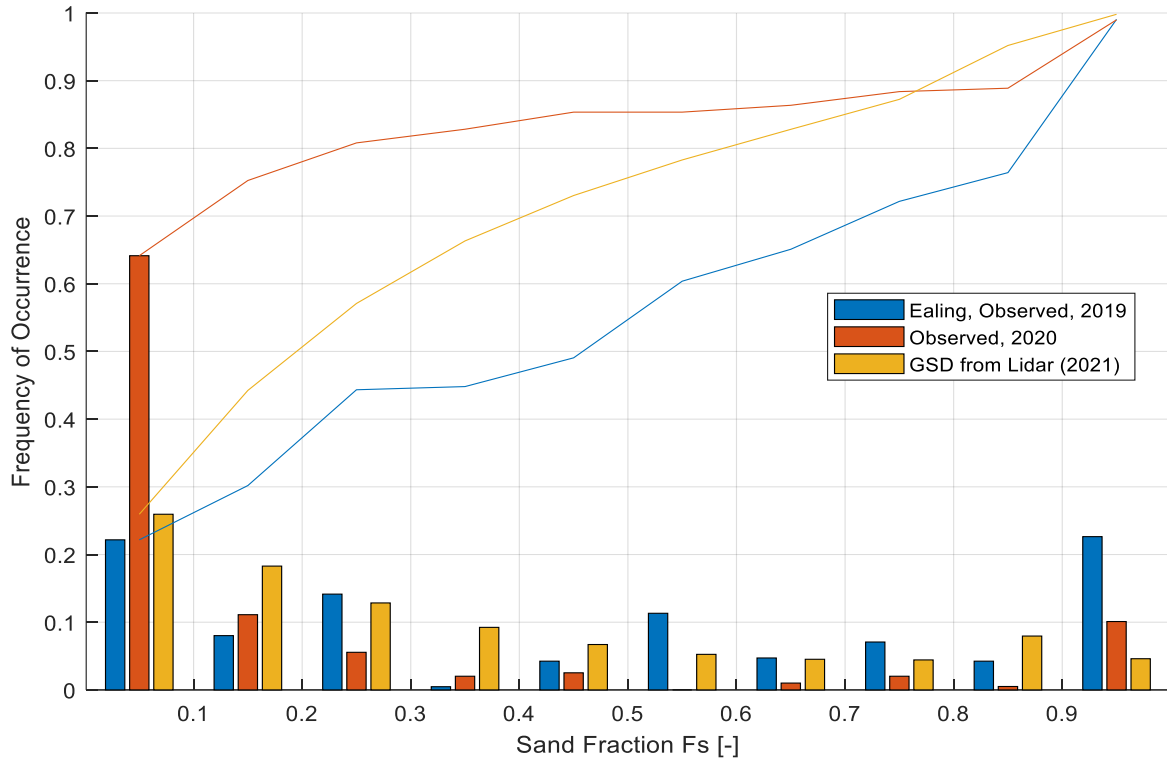

**Figure S3** – Histogram and cumulative frequency of surficial sand fraction ( $F_s$ ) from observed pebble counts in 2019 and 2020, compared with the  $F_s$  on exposed (non-vegetated) braidplain inferred from the class-based GSD estimates (Section 3.1).

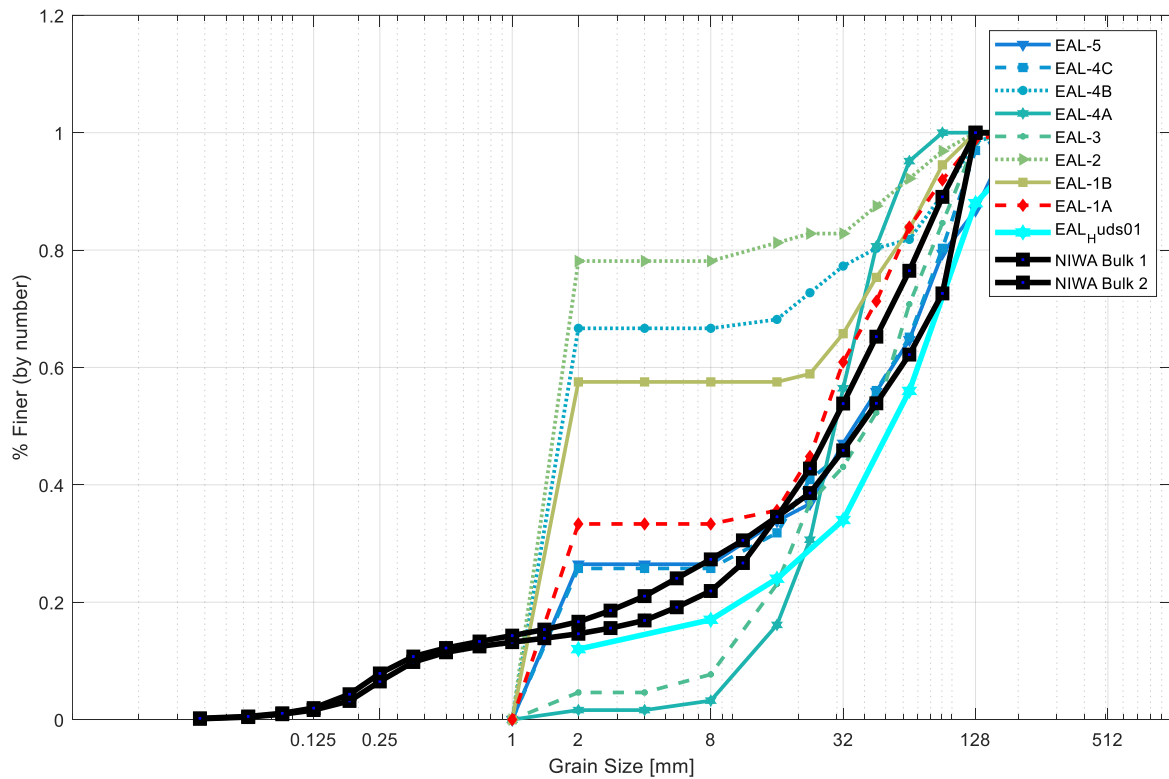

**Figure S4** – Grain size distribution from two bulk samples, compared with surficial pebble counts from this study (Section 3.1).

## Supplementary Model Inundation Images

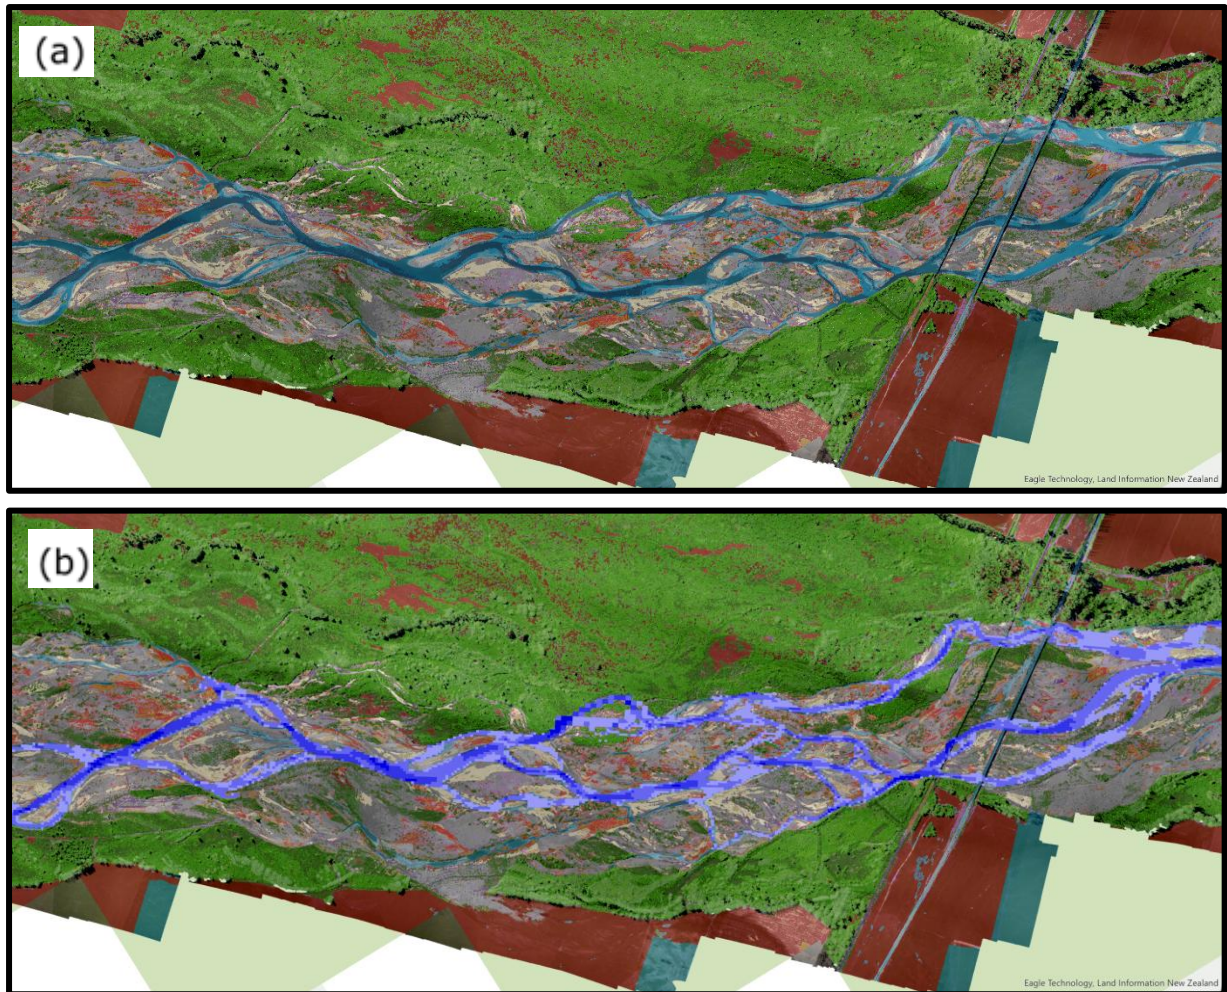

**Figure S5** – (a) Classified riverbed facies, KM 20. Flow rate during acquisition  $26 \pm 1 \text{ m}^3/\text{s}$  (b) Modelled depth of inundation overlay,  $Q_{\text{model}} = 25 \text{ m}^3/\text{s}$  (Section 4.1).

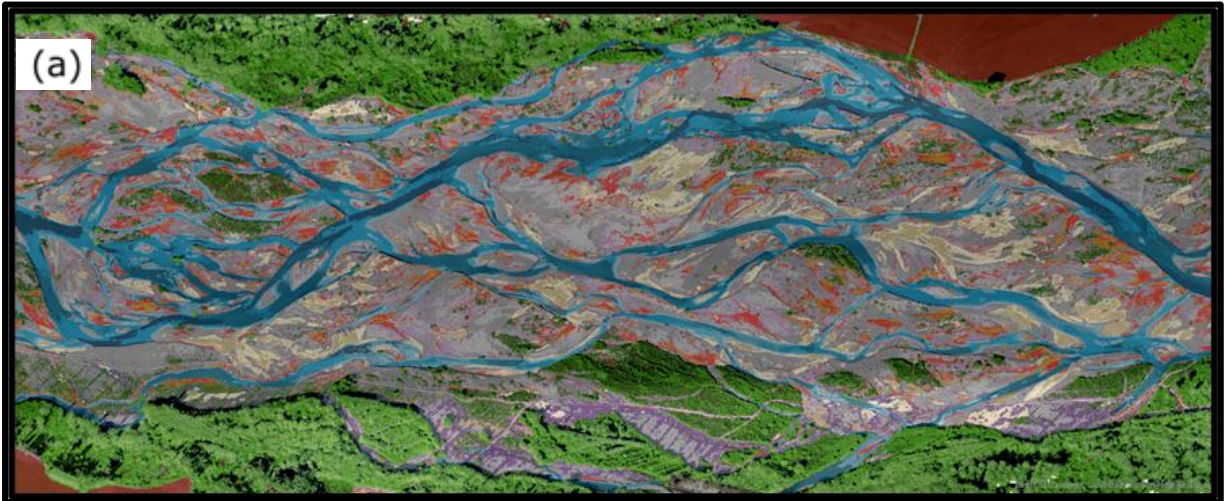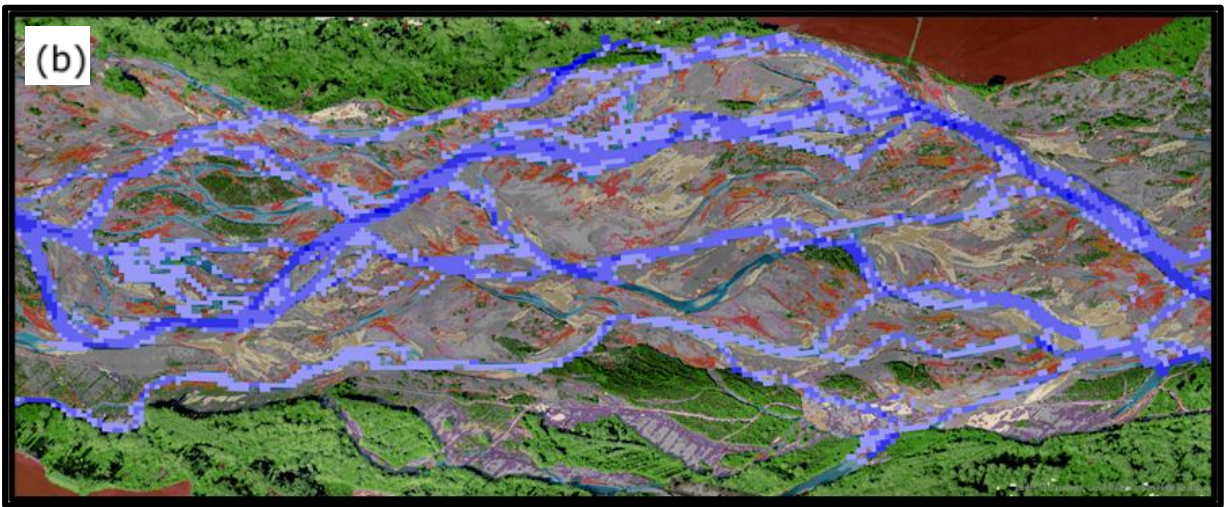

**Figure S6** – (a) Classified riverbed facies, KM 3. Flow rate during acquisition  $26 \pm 1 \text{ m}^3/\text{s}$  (b) Modelled depth of inundation overlay,  $Q_{\text{model}} = 25 \text{ m}^3/\text{s}$  (Section 4.1).

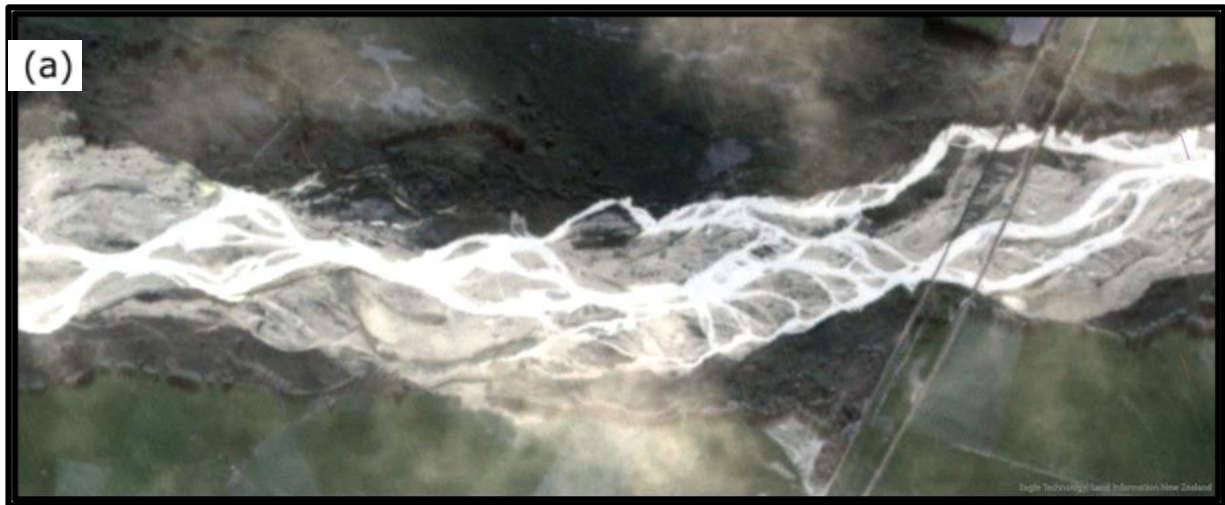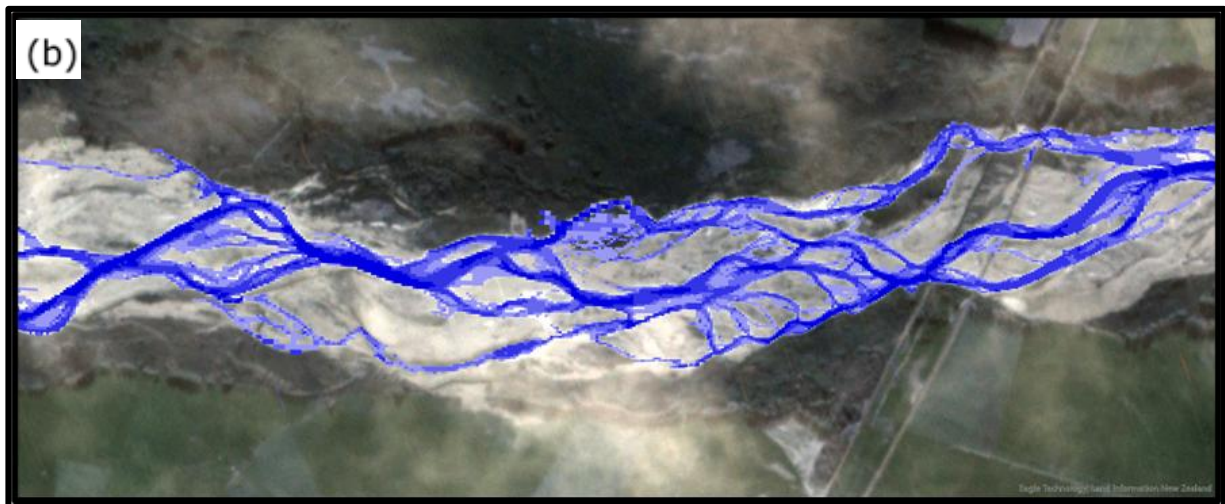

**Figure S7** – (a) Planet.com image. 10 April 2021, KM 20. Flow rate during acquisition between 150 and 182 m<sup>3</sup>/s (uncertainty due to flow abstraction and event celerity) (b) Modelled depth of inundation overlay,  $Q_{\text{model}} = 163 \text{ m}^3/\text{s}$ .

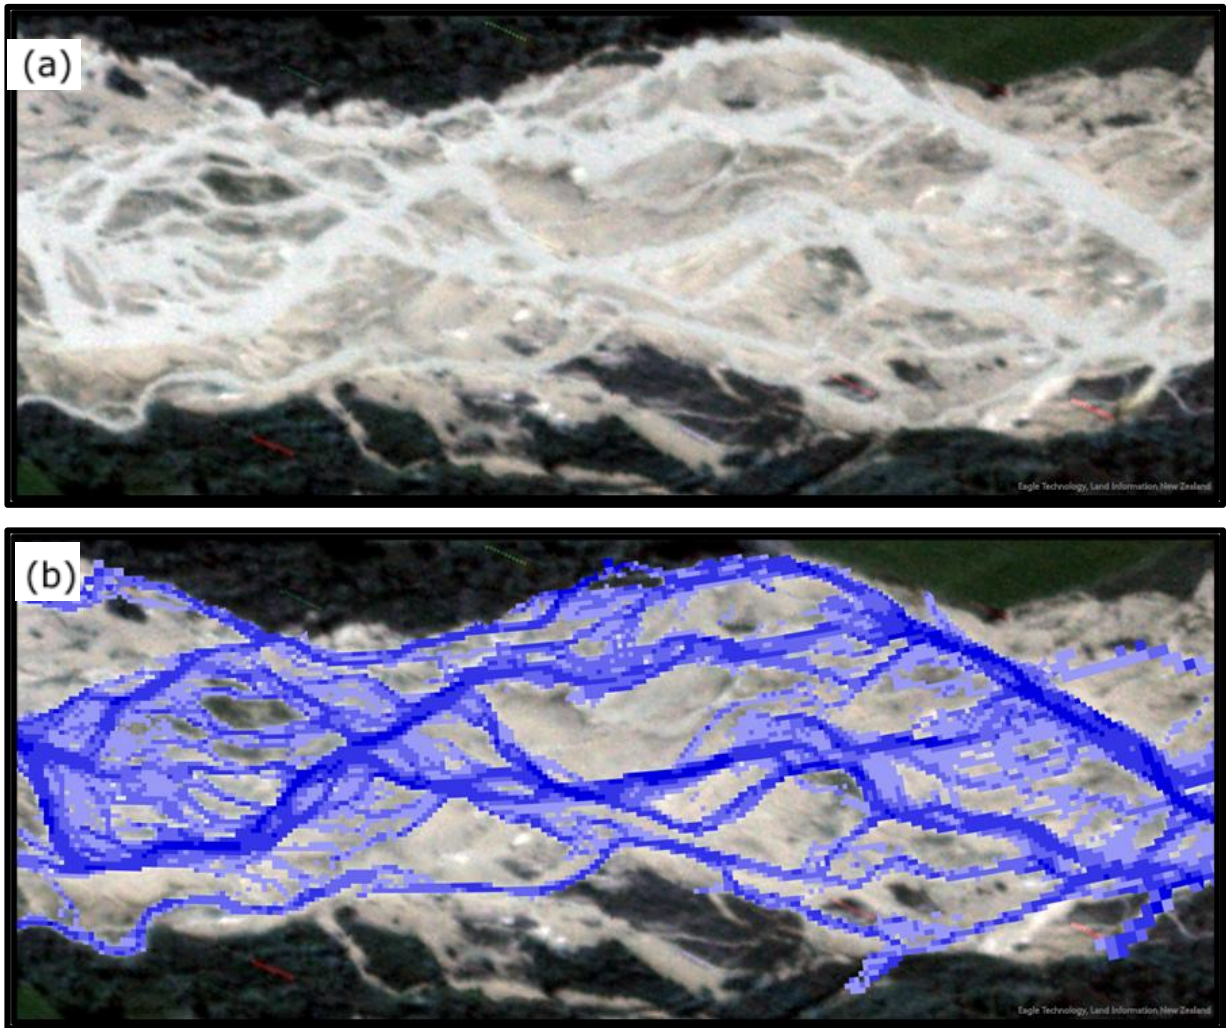

**Figure S7** – (a) Planet.com image. 10 April 2021, KM 3. Flow rate during acquisition between 150 and 182 m<sup>3</sup>/s (uncertainty due to flow abstraction and event celerity) (b) Modelled depth of inundation overlay,  $Q_{\text{model}} = 163 \text{ m}^3/\text{s}$ .
